# Supplementary material
Source: Research Square preprint supplement (doi:10.21203/rs.3.rs-8980126/v1)
Supplement: Supplementary file 1 [file 5f3e4f15149a917ba674f452.docx]

**Supporting Information**

**No hearts below the snow line: Snow loss and prey mismatch threaten alpine stoats under climate change**

*Mammal Research*

Marco Granata1*, Margherita Cattaneo1*, Sonia Calderola2, Maria Chiara Deflorian3, Laura Martinelli4, Luca Maurino5, Mirko Di Febbraro6, Sandro Bertolino1

1 Dipartimento di Scienze della Vita e Biologia dei Sistemi, Università degli Studi di Torino, via Accademia Albertina 13, 10123 Torino, Italy, [marco.granata@unito.it](mailto:marco.granata@unito.it)

2 Parco Nazionale Gran Paradiso, Via Pio VII 9, 10135 Torino, Italy

3 MUSE – Museo delle Scienze di Trento, Corso del Lavoro e della Scienza 3, 38122 Trento, Italy

4 Ente di gestione delle Aree Protette delle Alpi Marittime, Piazza Regina Elena 30, 12010 Valdieri, Cuneo, Italy

5 Ente di gestione delle Aree Protette delle Alpi Cozie, Via Fransuà Fontan 1, 10050 Salbertrand, Torino, Italy

6 EnviXLab, Dipartimento di Bioscienze e Territorio, Università degli Studi del Molise, Contrada Fonte Lappone, 80690 Pesche, Isernia, Italy

* These authors should be considered joint first authors

**Table S1** Institutions contributing to data collection on stoat and snow vole occurrences in the Italian Alps

| **Institution** | **Type of institution** |
| --- | --- |
| Regione Autonoma Friuli Venezia Giulia | Regional administration |
| Regione Piemonte | Regional administration |
| Parco Nazionale Dolomiti Bellunesi | National park |
| Parco Nazionale Gran Paradiso | National park |
| Parco Nazionale della Val Grande | National park |
| Aree Protette Alpi Cozie | Regional park |
| Aree Protette Alpi Marittime | Regional park |
| Aree Protette dell’Ossola | Regional park |
| Parco del Monviso | Regional park |
| Parco Naturale Mont Avic | Regional park |
| Museo Friulano di Storia Naturale | Museum |
| Museo Regionale di Scienze Naturali della Valle d’Aosta Efisio Noussan | Museum |
| Museo Civico di Storia Naturale di Morbegno | Museum |
| Museo Civico di Storia Naturale di Pordenone | Museum |
| MUSE – Museo delle Scienze di Trento | Museum |
| Museo di Scienze Naturali dell'Alto Adige | Museum |
| Associazione Teriologica Italiana (ATIt) | Association |
| Istituto per le Piante da Legno e l’Ambiente (IPLA) | Company |


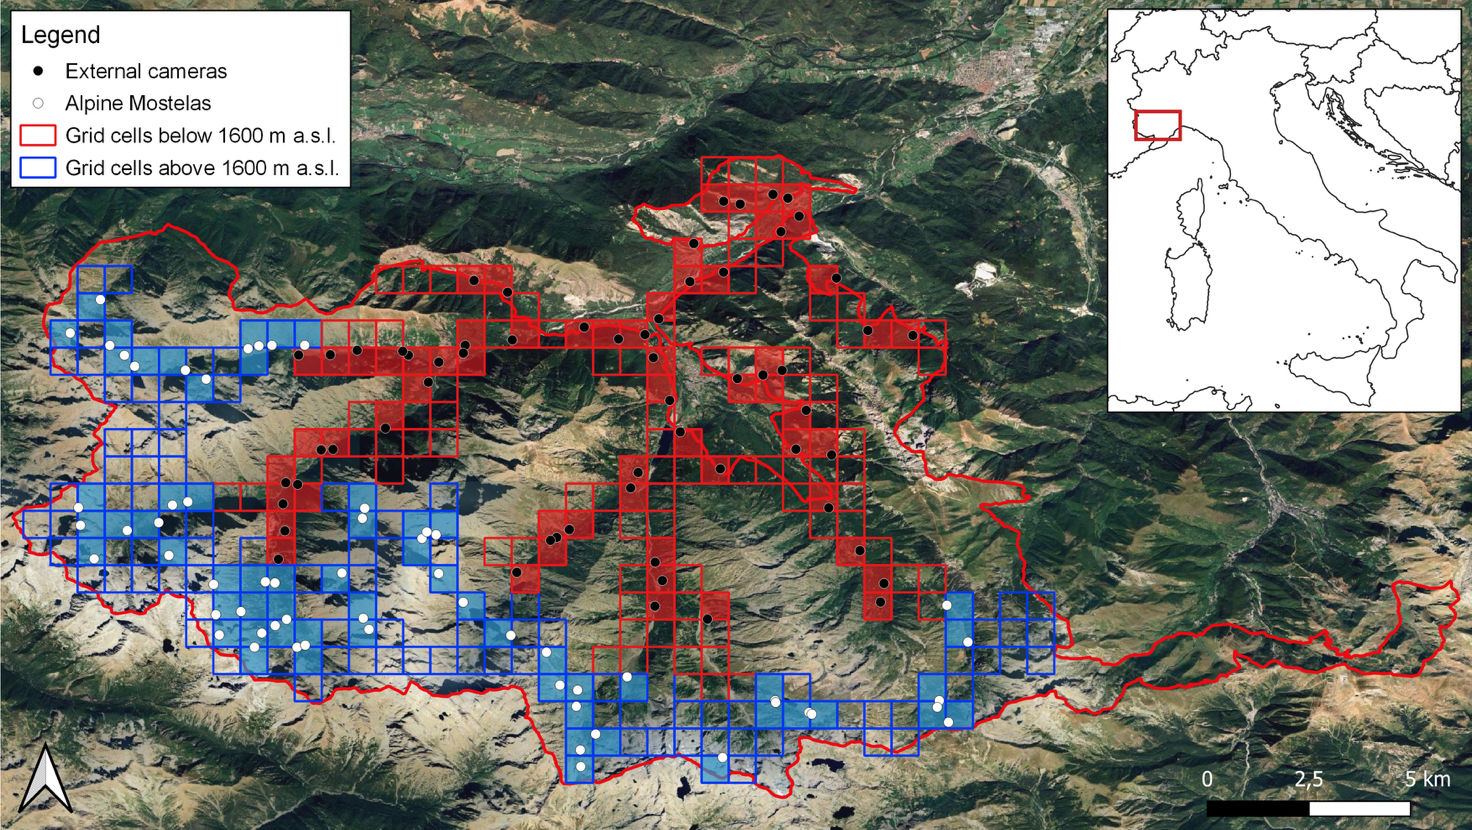


**Fig. S1** Sampling design for the 2024 field season in the Alpi Marittime Natural Park (southwestern Alps). A 1 x 1 km grid was superimposed over the study area, and 120 cells were randomly selected: 60 located above 1600 m a.s.l. (blue squares) and 60 below this threshold (red squares). Based on previous results (Granata et al. submitted), high-altitude cells were surveyed using the Alpine Mostela (white dots), a closed camera trap system specifically designed for small mustelids. The Alpine Mostela consists of a 60 x 40 x 22 cm foldable plastic box, crossed by a 9 cm Ø PVC tube, and equipped with a trail camera (model: Browning Dark Ops Pro 1080). No bait was used inside or outside the device. Lower-altitude cells were surveyed with traditional trail cameras (black dots). Cameras (model: KeepGuard) were mounted on tree trunks or roots approximately 40 cm above the ground. Salmon oil was applied to cotton wool placed inside a tea ball diffuser as a bait. Both Mostela and traditional cameras were set to record 20-second videos with a 30-second delay. Flash settings were configured to Power Save mode for Mostelas and Long Range mode for trail cameras

**
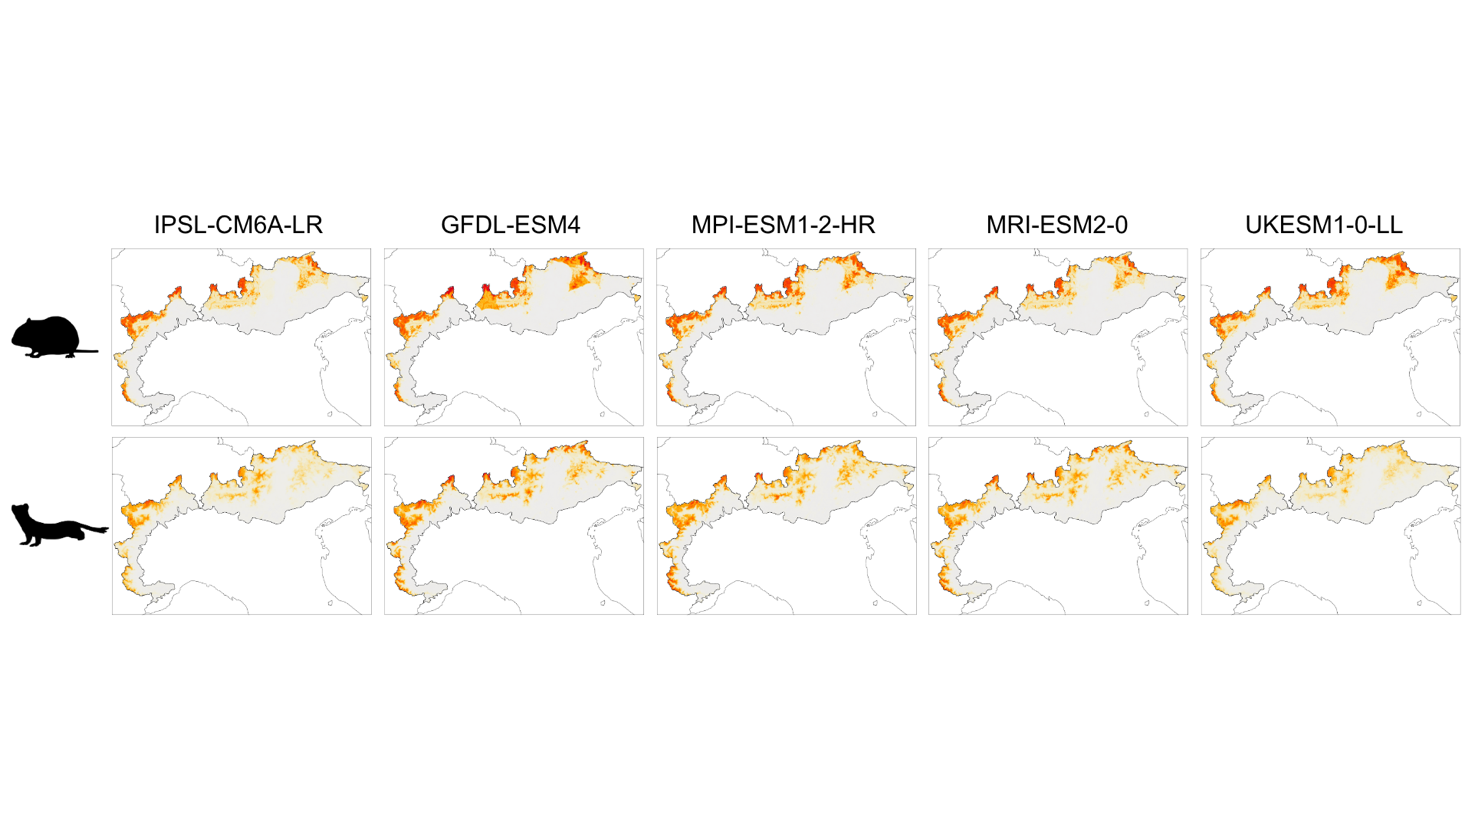
**

**Fig. S2** Modelled current and future environmental suitability for the snow vole (top) and the stoat (bottom) in the Italian Alps, projected across five different GCMs. Suitability is represented using a sequential color scale ranging from white (low suitability) through yellow and orange to red (high suitability)


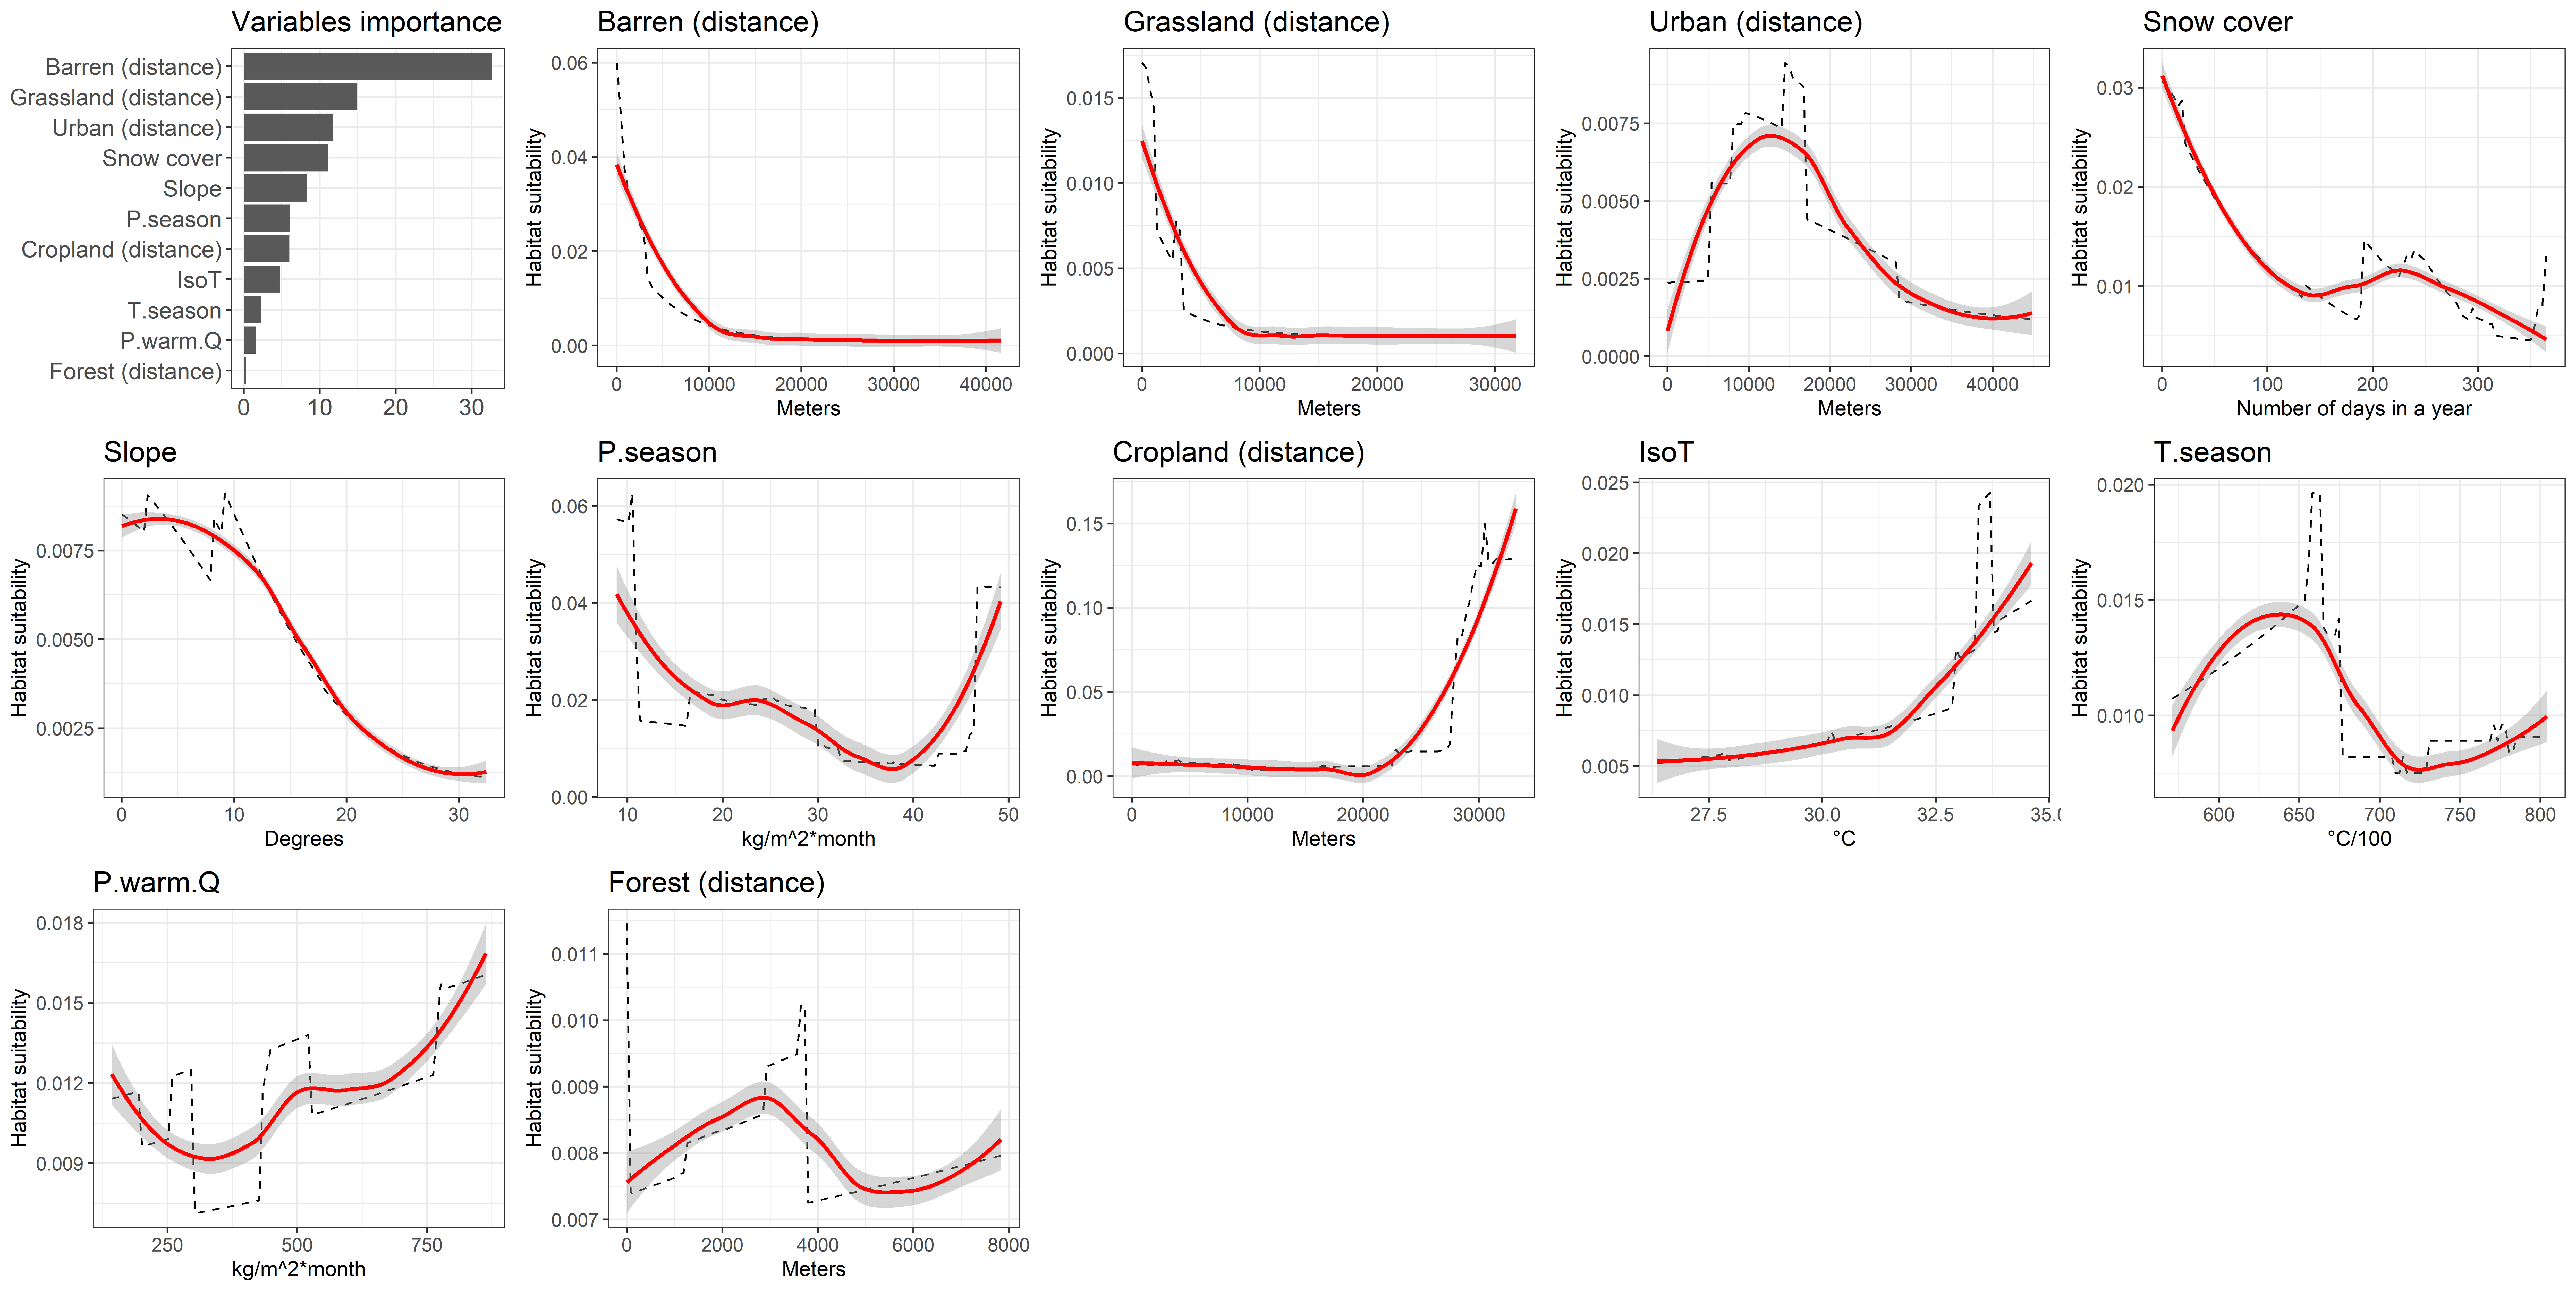


**Fig. S3** Percent contribution of variables to the overall model for the snow vole, and the response curves showing stoat response to the environmental predictors used in the SDM. Response curves were smoothed using a loess function


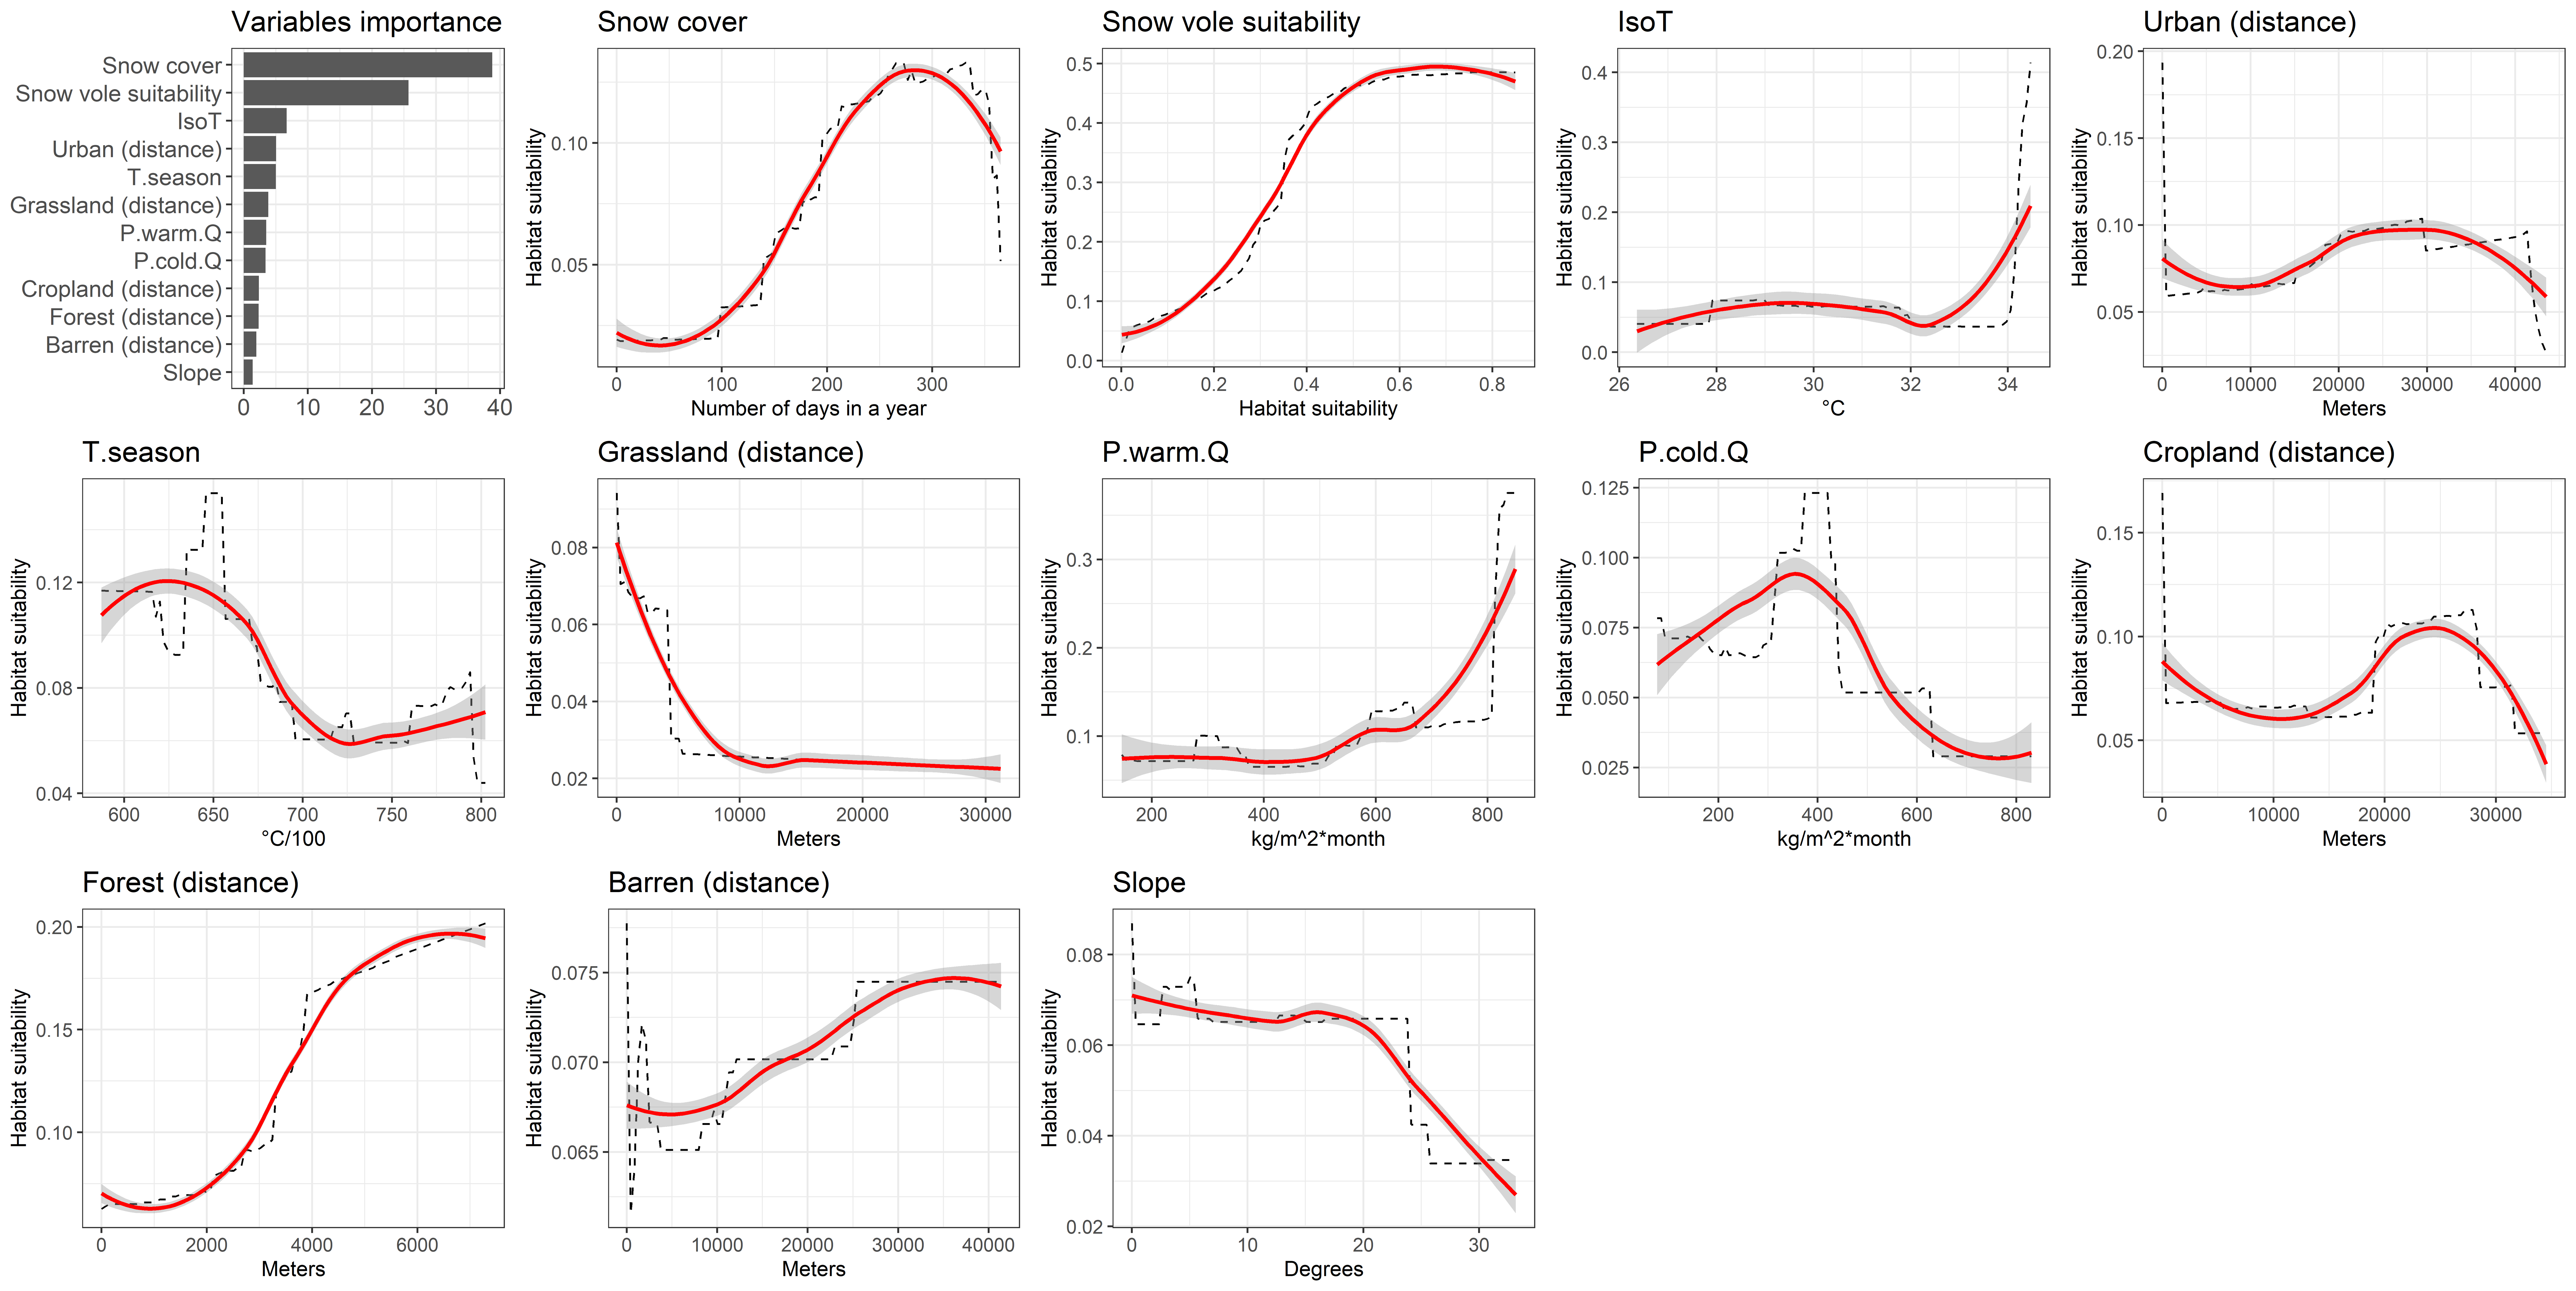


**Fig. S4** Percent contribution of variables to the overall model for the stoat, and the response curves showing stoat response to the environmental predictors used in the SDM. Response curves were smoothed using a loess function


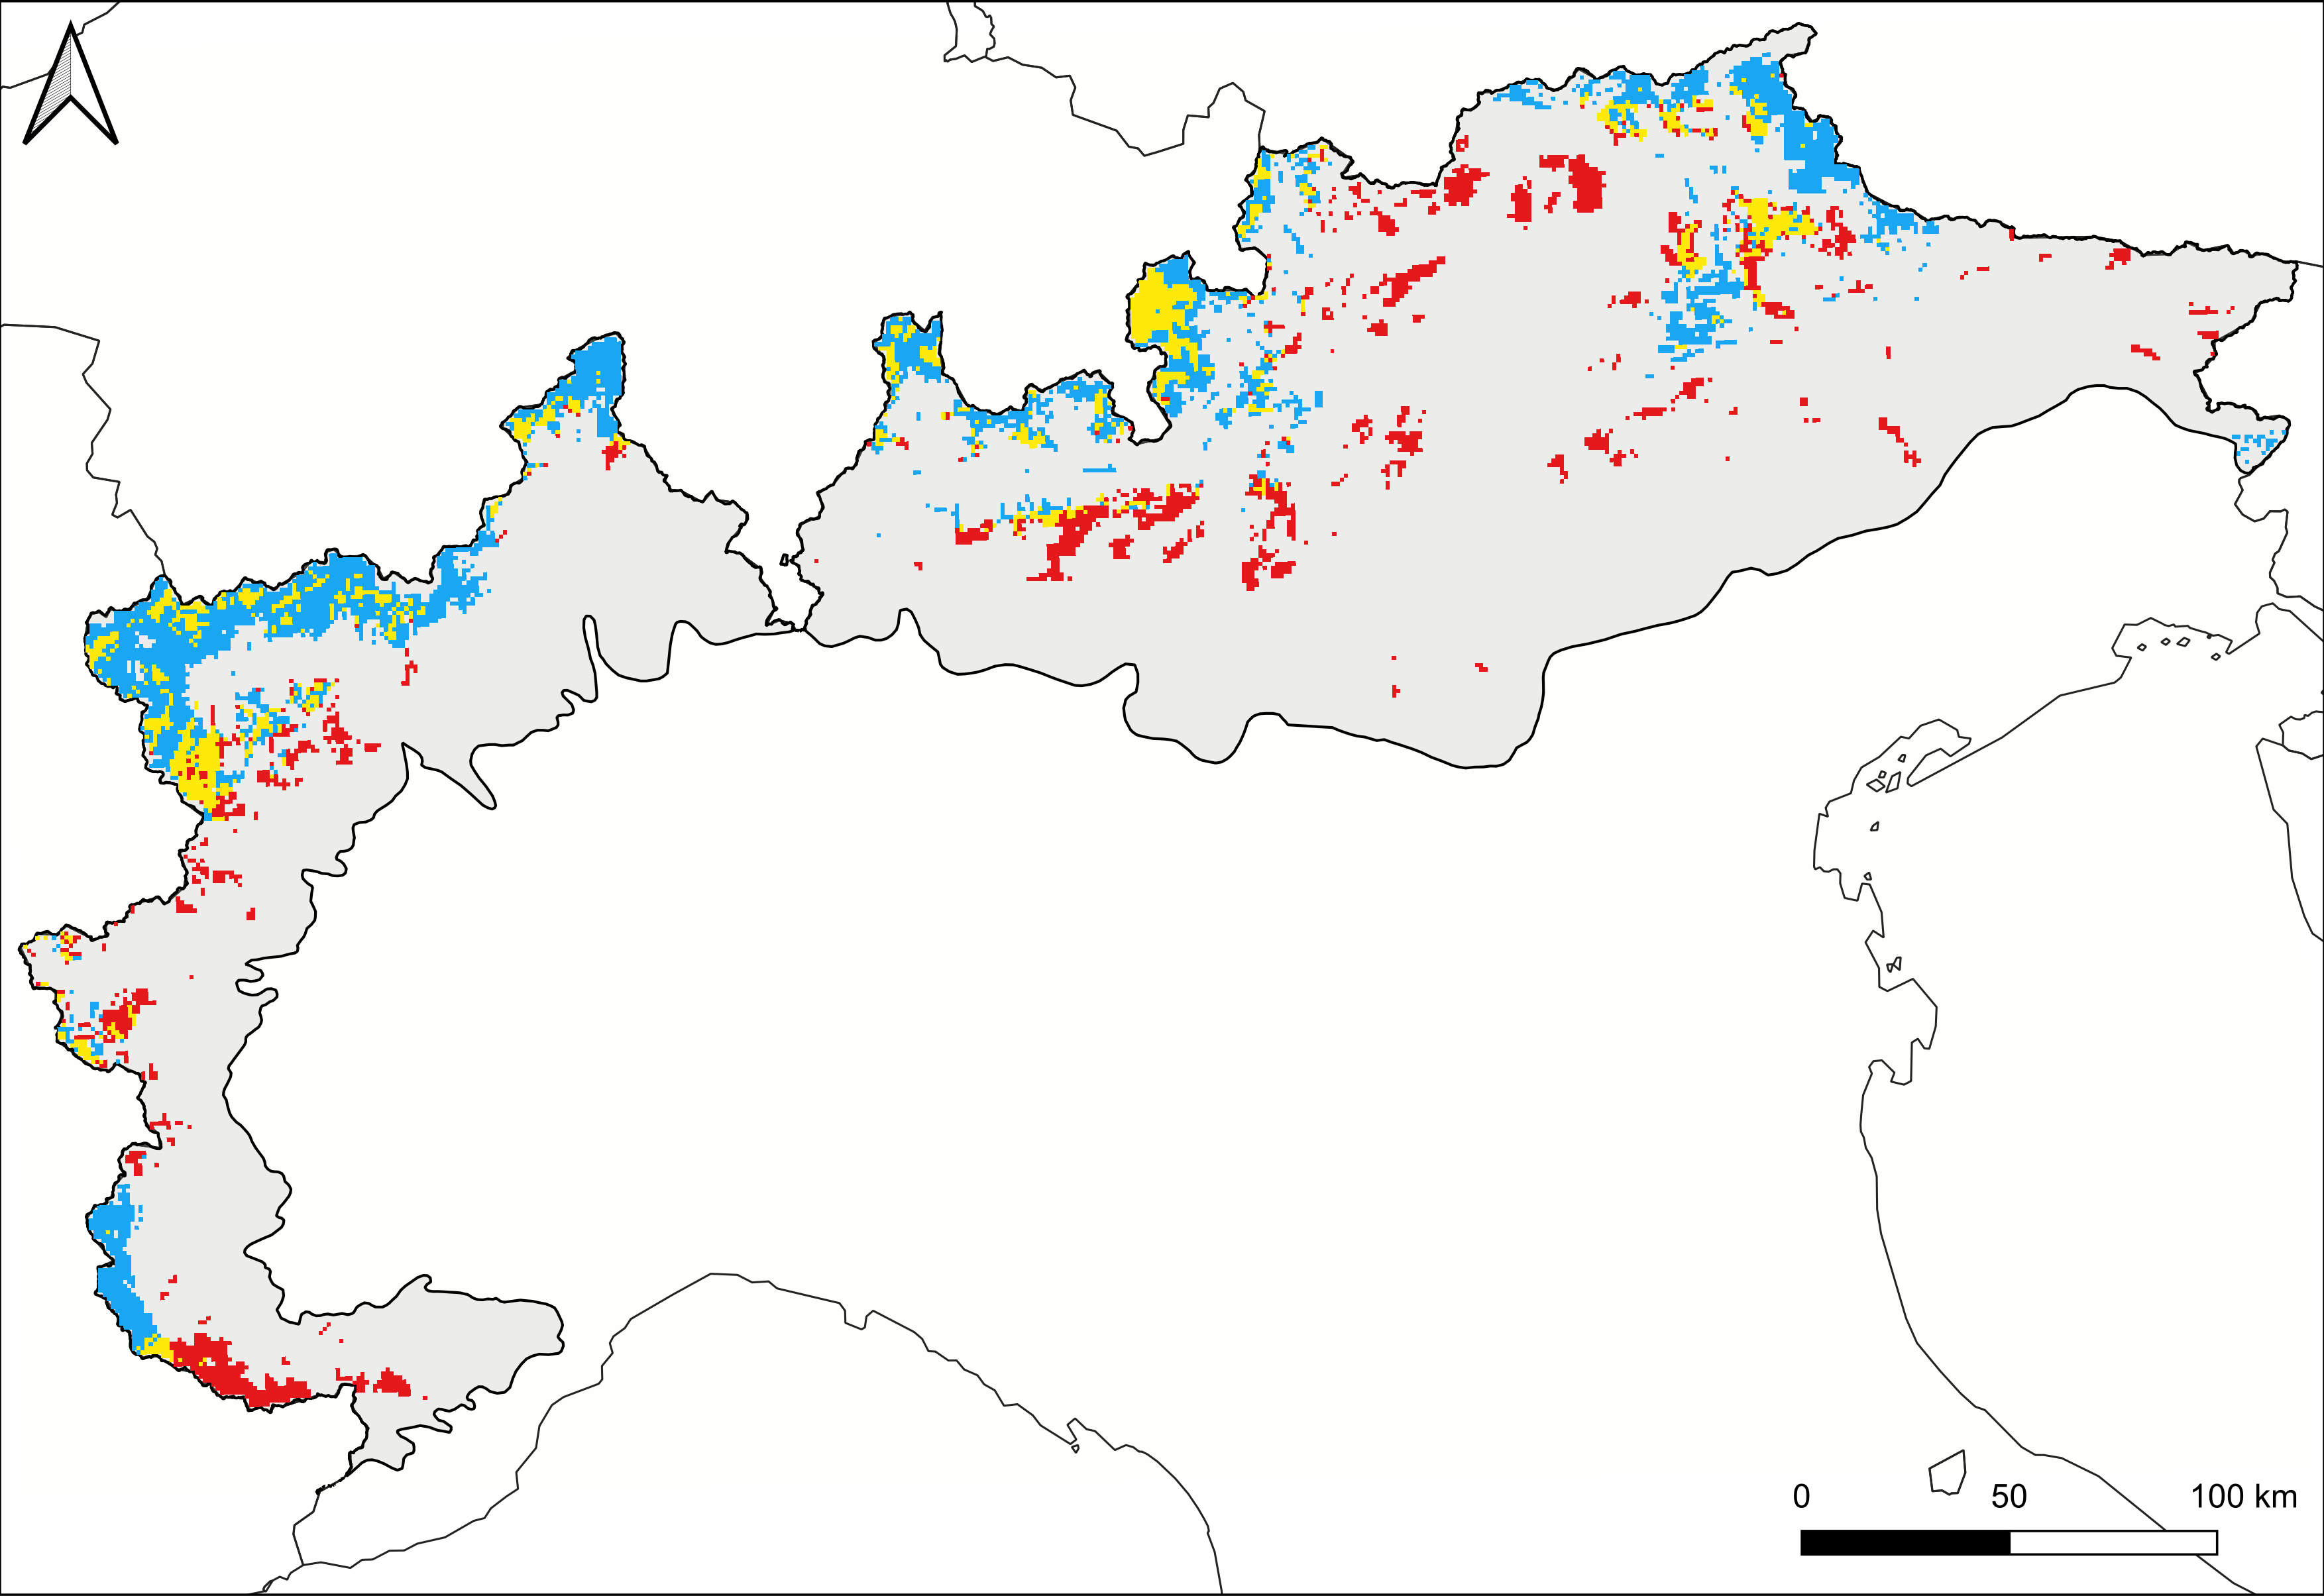


**Fig. S5** Projected changes in the distribution range of the snow vole by 2100 under land use and climate change scenarios, based on RCP 8.5. Areas of projected range gain are shown in blue, stable range in yellow, and range loss in red. Predictions were generated using the IPSL-CM6A-LR global circulation model and the ‘maximize specificity and sensibility’ binarization threshold

**
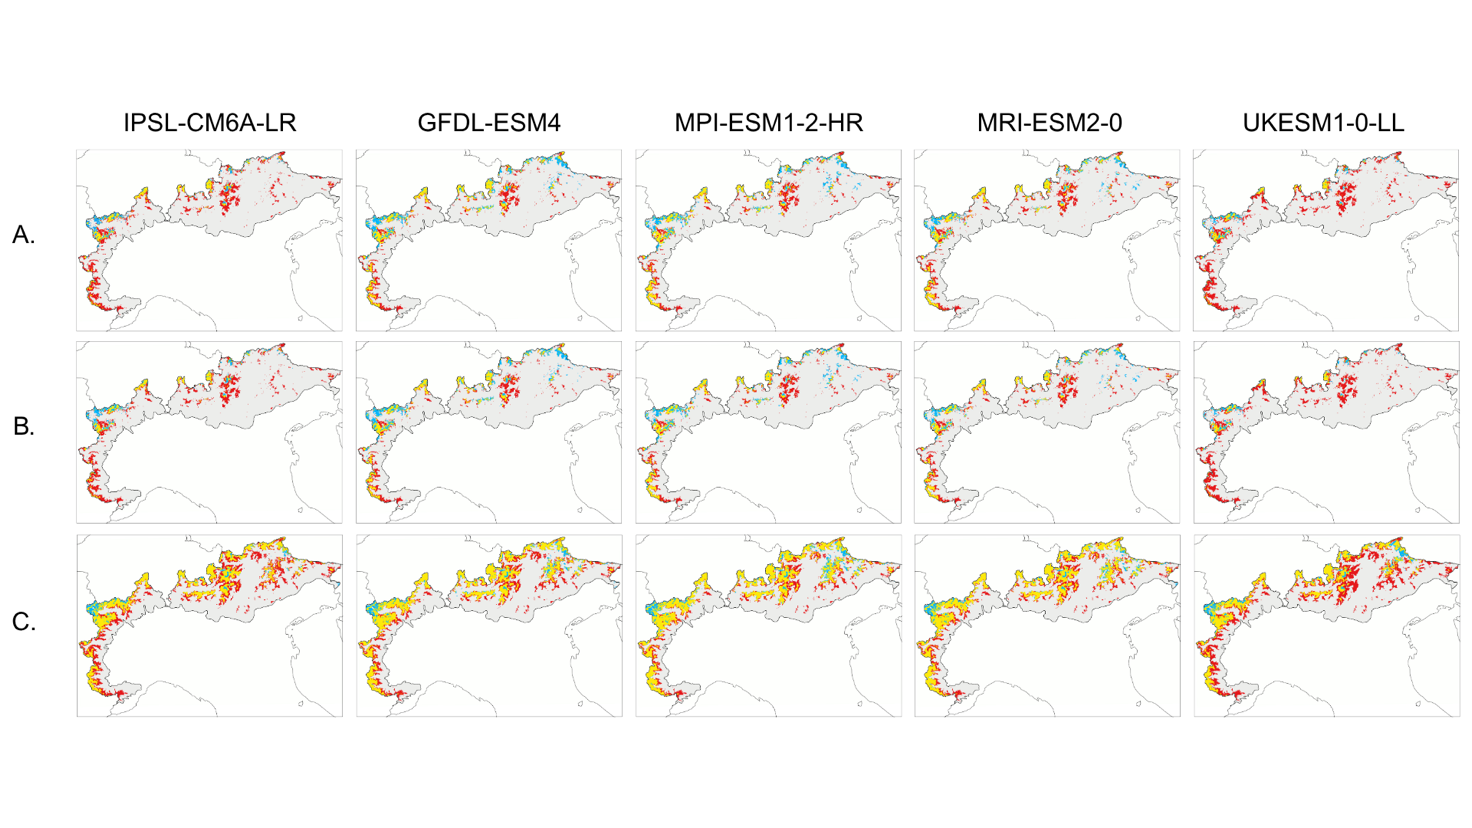
**
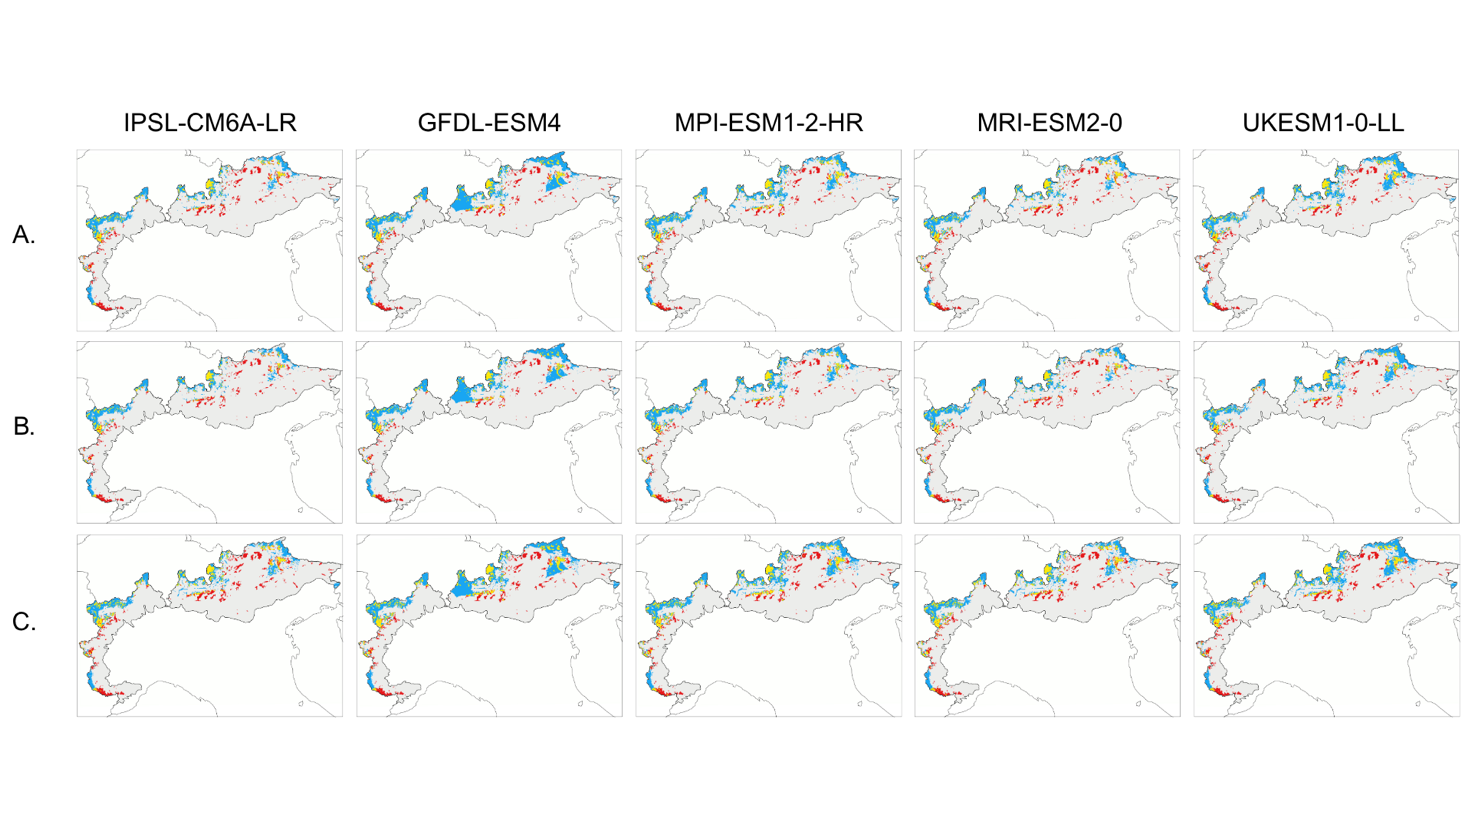


**Fig. S7** Projected changes in the distribution range of the stoat by 2100 under land use and climate change scenarios (RCP 8.5), modeled across five GCMs. Maps show results using three different threshold criteria: (A) ‘maximize sensitivity and specificity’, (B) ‘equalize sensitivity and specificity’, and (C) ‘minimum training presence’

**Fig. S6** Projected changes in the distribution range of the snow vole by 2100 under land use and climate change scenarios (RCP 8.5), modeled across five GCMs. Maps show results using three different threshold criteria: (A) ‘maximize sensitivity and specificity’, (B) ‘equalize sensitivity and specificity’, and (C) ‘minimum training presence’
